# Supplementary material for: Light-switchable nanoparticles based on amphiphilic diblock, triblock and heterograft polyoxazoline
Source: Royal Society of Chemistry journal article supplement (doi:10.1039/c7ra07094b), 2017-01-01
Supplement: c7ra07094b1.pdf [file c7ra07094b1.pdf]

## Light-Switchable Nanoparticles Based on Amphiphilic Diblock, Triblock and Heterografted Polyoxazoline

Laetitia Korchia, Cécile Bouilhac, Anne Aubert, Jean-Jacques Robin and Vincent Lapinte\*

*SI I. Quantification of photo-dimerization and photo-crosslinking efficiency and reversibility for both D, H and T from absorption coumarin band according to cycloaddition and cleavage respectively monitored by UV-vis spectroscopy*

Dimerization/de-dimerization rates at each times of irradiation are estimated from maximal absorbance measured for each ones. Concerning D and H, assuming that the initial absorption band corresponds to total de-dimerized form (single unimers), the maximal absorption band at  $t_0$  ( $A(t_0)$ ) is estimated at 100% of de-dimerization, in other terms 0% of dimerization. Other rates, where absorption band  $A(t)$  going to decrease with the irradiation at 350 nm (dimerization) are deduced from these values (dimerization(t)).

Calculation of dimerization/de-dimerization rates:

$$\text{Dimerization (t)} = 100 - \frac{A(t) \times 100}{A(t_0)} \quad (\%) \quad (\text{equation 1})$$

$$\text{De-dimerization (t)} = \frac{A(t) \times 100}{A(t_0)} \quad (\%) \quad (\text{equation 2})$$

Concerning T, the initial approximation is reverse. Initial chains are already dimerized and absorption band corresponds to the minimal value of dimerization which continues to grow under irradiation at 254 nm (de-dimerization). In previous works, we estimated (by NMR and

UV-vis spectroscopy) this rate of dimerization is above 97% (3% are de-dimerized) which corresponds to the initial absorbance value ( $A(t_0)$ ).

Calculation of dimerization/de-dimerization rates for T:

$$\text{De-dimerization (t)} = 100 - \frac{A(t) \times 3}{A(t_0)} \quad (\%) = Dd(\max)$$

$$\text{Dimerization (t)} = 100 - \frac{A(t) \times d_{\max}}{A(d_{\max})} \quad (\%)$$

SI II. Aging study of  $NP_D$ ,  $NP_{Dx}$ ,  $NP_H$ ,  $NP_{Hx}$  and  $NP_T$  nanoparticles by DLS during 60 days in the dark at room temperature (20 °C), under natural light exposure at room temperature and heating at 37 °C.

Aging study monitored by DLS during 60 days

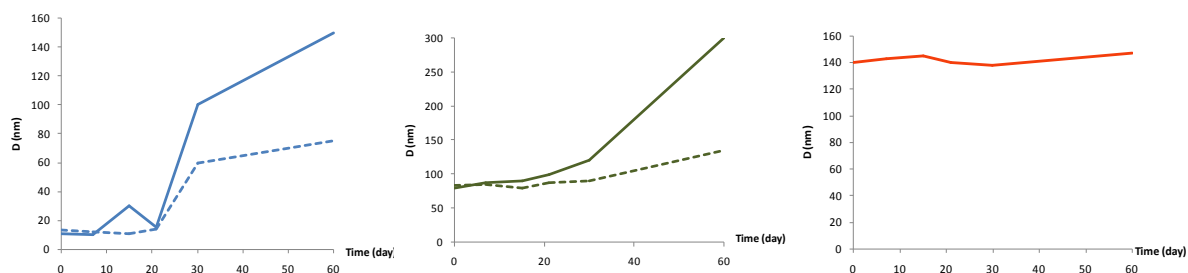

**Figure SI 1.** Size distribution evolution during 60 days for D (left), H (middle) and T (right) at 60°C.

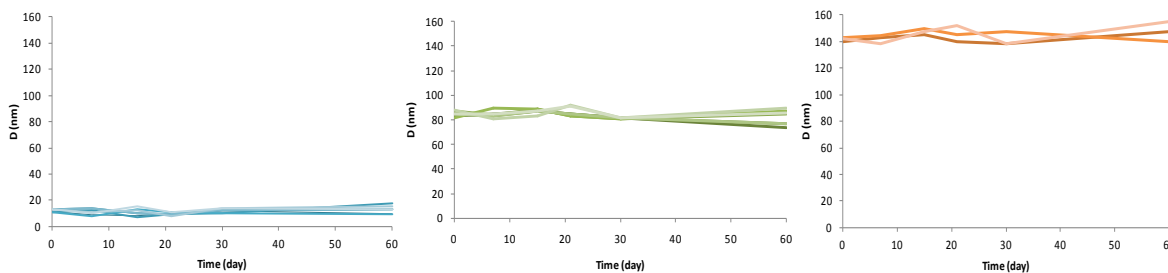

**Figure SI 2.** Size distribution evolution during 60 days for D (left), H (middle) and T (right) at room temperature (20 °C), under natural light exposure at room temperature and heating at 37 °C.

SI III. Nile Red loading of  $NP_D$ ,  $NP_{Dx}$ ,  $NP_H$ ,  $NP_{Hx}$  and  $NP_T$

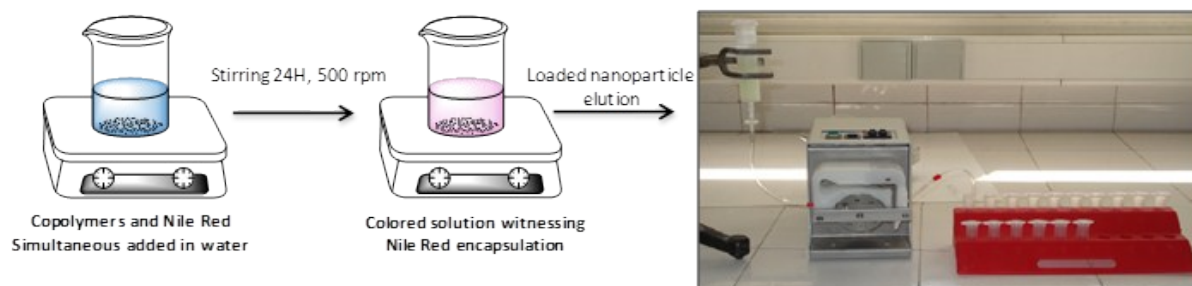

**Figure SI 3.** Illustration of loading processing and loaded NPs elution through a peristaltic pump.

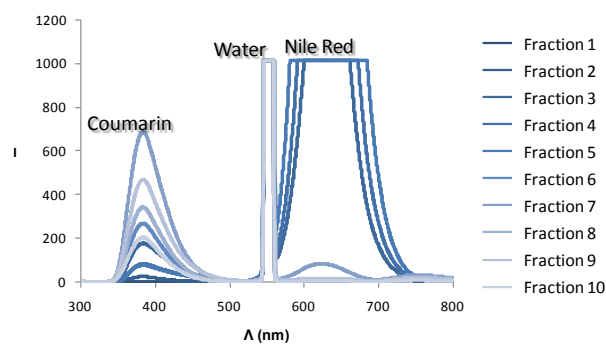

**Figure SI 4.** Emission spectra of eluted parts from  $NP_D$  encapsulated solutions recorded from 300 to 800 nm under  $\lambda_{excitation} = 552$  nm.

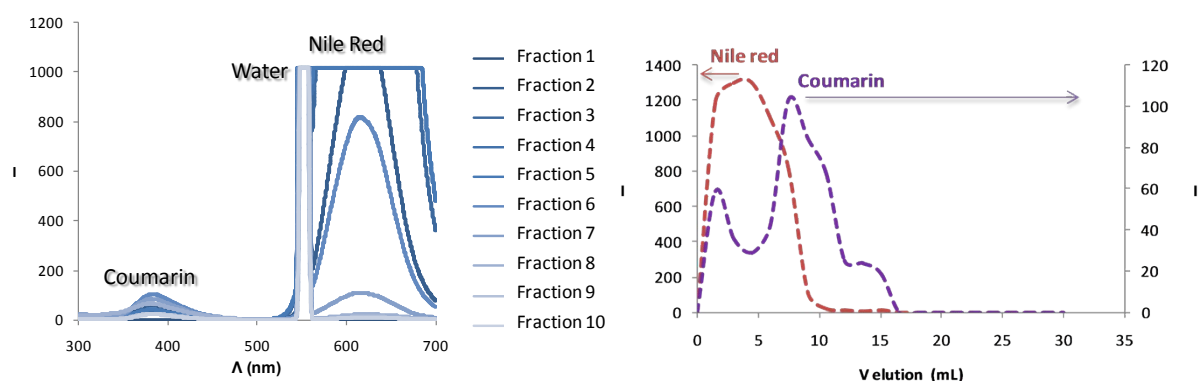

**Figure SI 5.** Emission spectra recorded from 300 to 700 nm under  $\lambda_{excitation} = 552$  nm (left) and respective reported maxima emission intensities of Nile Red and coumarin for each eluted part from  $NP_{Dx}$  encapsulated solutions.

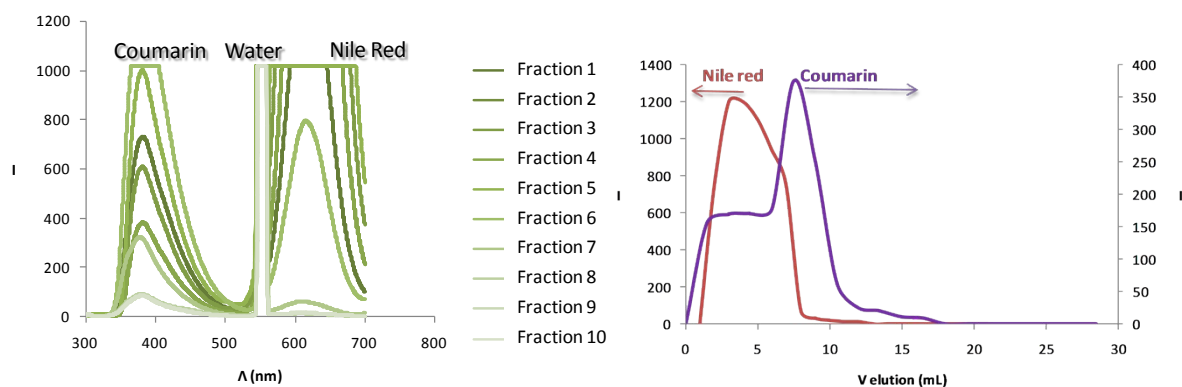

**Figure SI 6.** Emission spectra recorded from 300 to 700 nm under  $\lambda_{\text{excitation}} = 552$  nm (left) and respective reported maxima emission intensities of Nile Red and coumarin for each eluted part from  $\text{NP}_H$  encapsulated solutions.

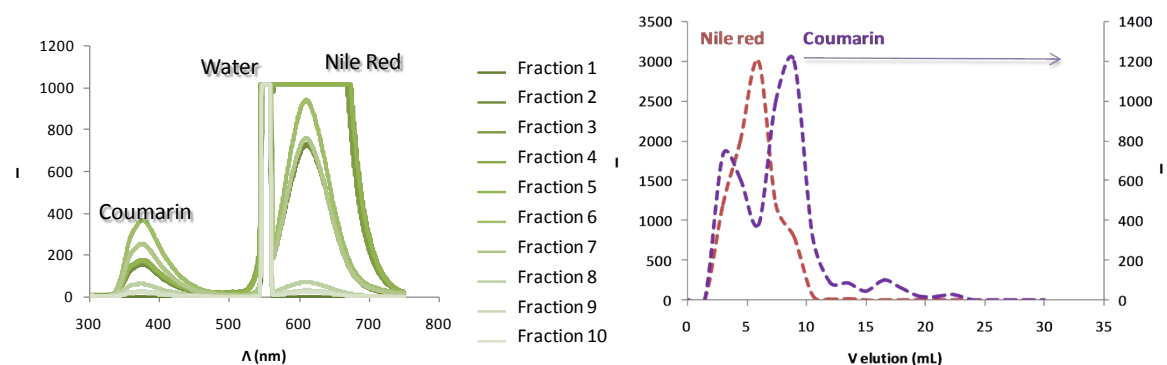

**Figure SI 7.** Emission spectra recorded from 300 to 700 nm under  $\lambda_{\text{excitation}} = 552$  nm (left) and respective reported maxima emission intensities of Nile Red and coumarin for each eluted part from  $\text{NP}_{Hx}$  encapsulated solutions.

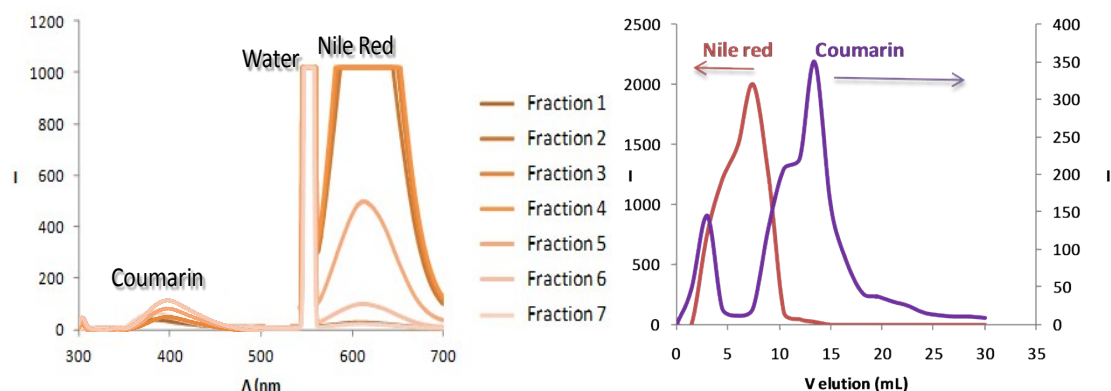

**Figure SI 8.** Emission spectra recorded from 300 to 700 nm under  $\lambda_{\text{excitation}} = 552$  nm (left) and respective reported maxima emission intensities of Nile Red and coumarin for each eluted part from  $\text{NP}_T$  encapsulated solutions.

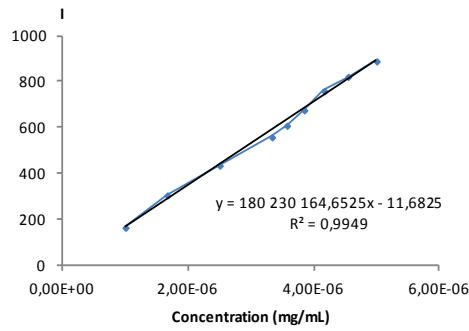

**Figure SI 9.** Nile Red calibration curve deduced from maxima intensities of Nile Red emission band for concentrations varying from  $1 \cdot 10^{-6}$  to  $5 \cdot 10^{-6}$  mg/mL.

Knowing initial concentration in polymer ( $5 \cdot 10^{-5}$  mg/mL,  $P_i$ ) and the amount of Nile Red initially introduced ( $5 \cdot 10^{-6}$  mg/mL,  $NR_i$ ), loading efficiency (D.L.E.) and capacity (D.L.C.) are determined for each NP solution from calibration curve to estimate the encapsulated Nile Red concentration ( $NRe$ ) and then according to the following calculation:

Calculation of D.L.E. and D.L.C. rates:

$$D.L.E. = \frac{NRe}{NR_i} * 100 (\%) \quad (\text{equation 3})$$

$$D.L.C. = \frac{NRe}{P_i} * 100 (\%) \quad (\text{equation 4})$$
